# Supplementary material for: Diversify the syllabi: Underrepresentation of female authors in college course readings
Source: PLoS One. 2020 Oct 28;15(10):e0239012. doi: 10.1371/journal.pone.0239012 (PMC7592743; doi:10.1371/journal.pone.0239012)
Supplement: S4 Data — (CSV) [file pone.0239012.s004.csv]

dept	F	M	Category
A&S-College	4		Humanities
African & African American Studies	1	3	Social Sciences
African & African American Studies		2	Social Sciences
African & African American Studies	1	1	Social Sciences
African & African American Studies		1	Social Sciences
American Culture Studies		2	Social Sciences
American Culture Studies		1	Social Sciences
Art History	3	2	Humanities
Art History	1	1	Humanities
Art History	2		Humanities
Arts & Sciences	2	1	Humanities
Center on Religion & Politics	2	2	Humanities
Center on Religion & Politics	2		Humanities
Classics	2	2	Humanities
Classics		3	Humanities
Classics	2	1	Humanities
Comparative Literature		1	Humanities
Comparative Literature		1	Humanities
East Asian Languages & Cultures	4	2	Humanities
East Asian Languages & Cultures		1	Humanities
East Asian Languages & Cultures	11	2	Humanities
East Asian Languages & Cultures	2	1	Humanities
English	7	13	Humanities
English	1	1	Humanities
English	10	6	Humanities
English	4	3	Humanities
Film & Media Studies	1	1	Humanities
Film & Media Studies	1		Humanities
Film & Media Studies		4	Humanities
Germanic Languages & Lit	4	3	Humanities
Germanic Languages & Lit		2	Humanities
Germanic Languages & Lit	1		Humanities
History	11	8	Humanities
History	3	2	Humanities
History		2	Humanities
Interdisciplinary Pgm In Humanities	1	1	Humanities
Interdisciplinary Pgm In Humanities		1	Humanities
International Studies	2	2	Social Sciences
Jewish, Islamic & Near Eastern	3	2	Humanities
Jewish, Islamic & Near Eastern	1	1	Humanities
Jewish, Islamic & Near Eastern	1	3	Humanities
Jewish, Islamic & Near Eastern	3		Humanities
Music	1	6	Humanities
Music	3	2	Humanities
Music	7	6	Humanities
Music	17	14	Humanities
Performing Arts	1	3	Humanities
Performing Arts	2		Humanities
Performing Arts	4	7	Humanities
Performing Arts	3	4	Humanities
Philosophy	2	10	Humanities
Philosophy	1	4	Humanities
Philosophy		3	Humanities
Political Science		1	Social Sciences
Religious Studies	1		Humanities
Romance Languages & Lit	10	9	Humanities
Romance Languages & Lit		1	Humanities
Romance Languages & Lit	15	6	Humanities
Romance Languages & Lit	3		Humanities
Women, Gender & Sexuality Studies	2	1	Humanities
Women, Gender & Sexuality Studies	3	1	Humanities
Women, Gender & Sexuality Studies	4		Humanities
Writing 1	11	5	Humanities
Writing 1	4	2	Humanities
Biology	5	18	STEM
Biology	3	6	STEM
Biology	16	14	STEM
Biology	1	1	STEM
Chemistry	2	15	STEM
Chemistry	1	4	STEM
Chemistry	6	6	STEM
Chemistry		1	STEM
Earth & Planetary Sciences		13	STEM
Earth & Planetary Sciences	2	2	STEM
Earth & Planetary Sciences	6	7	STEM
Earth & Planetary Sciences	2	2	STEM
Environmental Studies	3	3	STEM
Environmental Studies	1		STEM
Mathematics	3	16	STEM
Mathematics	3	4	STEM
Mathematics		3	STEM
Mathematics		2	STEM
Physics		16	STEM
Physics	2	6	STEM
Physics	4	7	STEM
Physics		1	STEM
Anthropology	8	14	Social Sciences
Anthropology	6	1	Social Sciences
Anthropology	2	3	Social Sciences
Economics	1	18	Social Sciences
Economics	3	2	Social Sciences
Economics	2		Social Sciences
Economics	1	4	Social Sciences
Education	4	2	Social Sciences
Education	1		Social Sciences
Education	2		Social Sciences
Education	4	1	Social Sciences
Gephardt Institute for Civic & Community Engagement	1	1	Social Sciences
Political Science	5	13	Social Sciences
Political Science	3	3	Social Sciences
Political Science		2	Social Sciences
Psychological & Brain Sciences	11	19	Social Sciences
Psychological & Brain Sciences	2	2	Social Sciences
Psychological & Brain Sciences	4	2	Social Sciences
Psychological & Brain Sciences	1	1	Social Sciences
Sociology	3	3	Social Sciences
Sociology	2	2	Social Sciences
Business School	9	35	Other
Business School	15	17	Other
Business School	8	31	Other
Business School	11	20	Other
Business School	6	5	Other
Architecture	5	12	Other
Architecture	4	4	Other
Architecture	6	6	Other
Architecture	8	22	Other
Art	7	11	Other
Art	4	1	Other
Art	4	4	Other
Art	10	14	Other
Design & Visual Arts		1	Other
Design & Visual Arts		1	Other
Biomedical Engineering	3	10	STEM
Biomedical Engineering	1	4	STEM
Biomedical Engineering	8	3	STEM
Biomedical Engineering		1	STEM
Computer Science & Engineering	2	16	STEM
Computer Science & Engineering	2	9	STEM
Computer Science & Engineering	2	8	STEM
Computer Science & Engineering	1	3	STEM
Electrical & Systems Engineering	1	8	STEM
Electrical & Systems Engineering	1	3	STEM
Electrical & Systems Engineering	2	10	STEM
Electrical & Systems Engineering	1	9	STEM
Energy, Environmental & Chemical Engineering	1	14	STEM
Energy, Environmental & Chemical Engineering	2	4	STEM
Energy, Environmental & Chemical Engineering	4	5	STEM
Energy, Environmental & Chemical Engineering	1	1	STEM
Engineering & Policy	6	2	STEM
Engineering & Policy	5	2	STEM
Engineering- Solar Enrgy, Enrgy Storage Ctr		1	STEM
Engineering-Applied Science		1	STEM
Engineering-EPRI/GEP		1	STEM
Engineering-Sever Institute		1	STEM
Engineering-Sever Institute	5	27	STEM
Engineering-UMSL Program		25	STEM
Mechanical Engineering & Materials Science	2	10	STEM
Mechanical Engineering & Materials Science	1	3	STEM
Mechanical Engineering & Materials Science	3	6	STEM
Mechanical Engineering & Materials Science		8	STEM
Law	13	17	Other
Law	3	3	Other
Law	5	5	Other
Law	4	5	Other
Law-Adjunct Professors	21	37	Other
Law-Clinical Education	6	4	Other
Law-Distance Learning Programs	3	5	Other
Law-Environmental Clinic	2	2	Other
Law-International Programs	1		Other
Social Work	10	11	Social Sciences
Social Work	3	2	Social Sciences
Social Work	11	4	Social Sciences
Social Work	50	18	Social Sciences
Social Work-Ctr for PH Systems Science		1	Social Sciences
Social Work-Health Communication Lab	1		Social Sciences
Social Work-Health Communication Lab	1		Social Sciences
Social Work-Prevention Research Center	4		Social Sciences
Social Work-Prevention Research Center	1		Social Sciences
Social Work-Public Health	8	10	Social Sciences
Social Work-Public Health	2	1	Social Sciences
Social Work-Public Health	6	1	Social Sciences
Social Work-Public Health	6		Social Sciences
Social Work-Social Policy Institute		1	Social Sciences
University College	53	40	Other
